# Supplementary material for: Effect of Anti-Interleukin-6 Agents on Psychopathology in a Sample of Patients with Post-COVID-19 Syndrome: An Observational Study
Source: MDPI journal article supplement (doi:10.3390/brainsci14010047), 2024-01-03
Supplement: s1 [file s1]

---

**Supplement**

|                                  |       |
|----------------------------------|-------|
| Table S1:.....                   | Pag 2 |
| Psychopathological scales: ..... | Pag 3 |

**Table S1.** Pearson correlations among psychopathological scales.

|                | BPRS Total | HAMA Total | HAM-D Total | MRS Total | KMRSD Total | CAPS Total | CD-RISC Total | DERS Total | SHAPS Total | PSQI Total | BHS Total |
|----------------|------------|------------|-------------|-----------|-------------|------------|---------------|------------|-------------|------------|-----------|
| BPRS Total     | 1          | .542       | .616        | .355      | .446        | .491       | -.170         | .201       | .106        | .261       | .016      |
| HAM-A Total    | .542       | 1          | .866        | .432      | .530        | .738       | -.255         | .223       | .115        | .167       | .030      |
| HAM-D Total    | .616       | .866       | 1           | .491      | .600        | .730       | -.231         | .229       | .149        | .160       | .001      |
| MRS Total      | .355       | .432       | .491        | 1         | .564        | .512       | -.077         | .112       | .000        | .057       | -.030     |
| KMRSD Total    | .446       | .530       | .600        | .564      | 1           | .611       | -.137         | .193       | -.025       | .112       | -.008     |
| CAPS Total     | .491       | .738       | .730        | .512      | .611        | 1          | -.196         | .220       | .030        | .146       | .039      |
| CD-RISC Total  | -.170      | -.255      | -.231       | -.077     | -.137       | -.196      | 1             | -.264      | -.066       | -.131      | .186      |
| DERS Total     | .201       | .223       | .229        | .112      | .193        | .220       | -.264         | 1          | .182        | .118       | .116      |
| SHPS_TOT Total | .106       | .115       | .149        | .000      | -.025       | .030       | -.066         | .182       | 1           | .084       | .150      |
| PSQI_TOT Total | .261       | .167       | .160        | .057      | .112        | .146       | -.131         | .118       | .084        | 1          | .017      |
| BHS_TOT Total  | .016       | .030       | .001        | -.030     | -.008       | .039       | .186          | .116       | .150        | .017       | 1         |

**Legend:** BHS, Beck Hopelessness Scale; BPRS, Brief-Psychiatric Rating Scale; CAPS, Clinician-Administered PTSD Scale; CD-RISC, Connor-Davidson Resilience Scale; Ctrl, patients who did not receive anti-interleukin-6-receptor treatment; DERS, Difficulties in Emotion Regulation scale; HAM-A, Hamilton Anxiety rating scale; HAM-D, Hamilton rating scale for depression; KMDRS, Koukopoulos Mixed Depression Rating Scale; PSQI, Pittsburgh Sleep Quality Index; SAR, patients receiving sarilumab during hospitalization; SD, standard deviation; SHAPS, Snaith-Hamilton Pleasure Scale; SpO2, peripheral capillary oxygen saturation; TOC, patients receiving Tocilizumab during hospitalization.

**CD-RISC - Scala di Connor-Davidson**

**Istruzioni:** per cortesia, indicate quanto siete d'accordo con le seguenti affermazioni in base a quando si sono verificate il mese scorso. Se una di queste situazioni non si è verificata di recente, rispondete in base a ciò che avreste provato.

|                                                                                                                              | MAI                   | QUASI MAI             | A VOLTE               | SPESSO                | MOLTO SPESSO          |
|------------------------------------------------------------------------------------------------------------------------------|-----------------------|-----------------------|-----------------------|-----------------------|-----------------------|
| 1. Sono in grado di adattarmi ai cambiamenti.                                                                                | <input type="radio"/> |
| 2. Ho almeno una relazione intima e stabile su cui posso contare nei momenti di difficoltà.                                  | <input type="radio"/> |
| 3. Quando non vedo una via d'uscita ai miei problemi, penso che Dio o il destino possono venirmi incontro.                   | <input type="radio"/> |
| 4. Posso affrontare qualsiasi imprevisto.                                                                                    | <input type="radio"/> |
| 5. I risultati positivi ottenuti in passato mi incoraggiano ad affrontare nuove sfide e difficoltà.                          | <input type="radio"/> |
| 6. Cerco di vedere il lato ironico dei problemi.                                                                             | <input type="radio"/> |
| 7. Affrontare eventi stressanti mi rende più forte.                                                                          | <input type="radio"/> |
| 8. Tendo a lasciarmi alle spalle episodi negativi del passato, come i problemi di salute, i danni subiti, o altre avversità. | <input type="radio"/> |
| 9. Credo che la maggior parte degli eventi, buoni o cattivi, accadono per una precisa ragione.                               | <input type="radio"/> |
| 10. Mi impegno a dare il meglio di me, indipendentemente dal risultato.                                                      | <input type="radio"/> |
| 11. Sono convinto di poter raggiungere i miei obiettivi, anche in presenza di ostacoli.                                      | <input type="radio"/> |
| 12. Affronto gli ostacoli anche quando sembrano insuperabili.                                                                | <input type="radio"/> |
| 13. So a chi rivolgermi per avere un aiuto nei momenti di crisi.                                                             | <input type="radio"/> |

- |                                                                                                       |                       |                       |                       |                       |                       |
|-------------------------------------------------------------------------------------------------------|-----------------------|-----------------------|-----------------------|-----------------------|-----------------------|
| 14. Quando sono sotto pressione, riesco a rimanere lucido e concentrato su quello che sto facendo.    | <input type="radio"/> |
| 15. Preferisco cercare di risolvere i miei problemi da solo, piuttosto che lasciarlo fare agli altri. | <input type="radio"/> |
| 16. Non mi lascio abbattere facilmente dagli insuccessi.                                              | <input type="radio"/> |
| 17. Mi considero una persona decisa nell'affrontare le sfide e le difficoltà della vita.              | <input type="radio"/> |
| 18. Se necessario, sono capace di prendere decisioni impopolari o difficili per gli altri.            | <input type="radio"/> |
| 19. Sono in grado di sopportare sentimenti spiacevoli e dolorosi, come tristezza, rabbia e paura.     | <input type="radio"/> |
| 20. Talvolta per riuscire a cavarsela bisogna fidarsi del proprio istinto ed affidarsi al destino.    | <input type="radio"/> |
| 21. Sono convinto che nella vita ci sia un senso.                                                     | <input type="radio"/> |
| 22. Sento di avere il controllo della mia vita.                                                       | <input type="radio"/> |
| 23. Amo le sfide.                                                                                     | <input type="radio"/> |
| 24. Mi impegno per raggiungere i miei obiettivi, senza preoccuparmi degli ostacoli che incontro.      | <input type="radio"/> |
| 25. Sono fiero di quello che ho realizzato.                                                           | <input type="radio"/> |



**DERS - Difficulties in Emotion Regulation Scale**

Utilizzando la seguente scala di valori, le chiediamo di segnare quanto spesso le seguenti affermazioni possono essere applicate alla sua esperienza, cercando il numero appropriato a fianco di ogni item.

|                                                                                 | Quasi mai<br>(0-10%)  | a volte (11-35%)      | circa la metà<br>delle volte<br>(36-65%) | molte volte<br>(66-90%) | quasi sempre<br>(91-100%) |
|---------------------------------------------------------------------------------|-----------------------|-----------------------|------------------------------------------|-------------------------|---------------------------|
| 1. Sono sereno riguardo a ciò che provo                                         | <input type="radio"/> | <input type="radio"/> | <input type="radio"/>                    | <input type="radio"/>   | <input type="radio"/>     |
| 2. Presto attenzione a come mi sento                                            | <input type="radio"/> | <input type="radio"/> | <input type="radio"/>                    | <input type="radio"/>   | <input type="radio"/>     |
| 3. Vivo le mie emozioni come travolgenti e fuori dal controllo                  | <input type="radio"/> | <input type="radio"/> | <input type="radio"/>                    | <input type="radio"/>   | <input type="radio"/>     |
| 4. Non ho idea di come mi sento                                                 | <input type="radio"/> | <input type="radio"/> | <input type="radio"/>                    | <input type="radio"/>   | <input type="radio"/>     |
| 5. Ho difficoltà a dare un senso a ciò che provo                                | <input type="radio"/> | <input type="radio"/> | <input type="radio"/>                    | <input type="radio"/>   | <input type="radio"/>     |
| 6. Sono attento alle mie sensazioni                                             | <input type="radio"/> | <input type="radio"/> | <input type="radio"/>                    | <input type="radio"/>   | <input type="radio"/>     |
| 7. So esattamente come mi sento                                                 | <input type="radio"/> | <input type="radio"/> | <input type="radio"/>                    | <input type="radio"/>   | <input type="radio"/>     |
| 8. Cerco di capire come mi sento                                                | <input type="radio"/> | <input type="radio"/> | <input type="radio"/>                    | <input type="radio"/>   | <input type="radio"/>     |
| 9. Sono confuso riguardo a ciò che provo                                        | <input type="radio"/> | <input type="radio"/> | <input type="radio"/>                    | <input type="radio"/>   | <input type="radio"/>     |
| 10. Quando sono turbato, riconosco le mie emozioni                              | <input type="radio"/> | <input type="radio"/> | <input type="radio"/>                    | <input type="radio"/>   | <input type="radio"/>     |
| 11. Quando sono turbato, mi arrabbio con me stesso perché mi sento in quel modo | <input type="radio"/> | <input type="radio"/> | <input type="radio"/>                    | <input type="radio"/>   | <input type="radio"/>     |
| 12. Quando sono turbato, mi imbarazza sentirmi in quel modo                     | <input type="radio"/> | <input type="radio"/> | <input type="radio"/>                    | <input type="radio"/>   | <input type="radio"/>     |
| 13. Quando sono turbato, ho delle difficoltà a completare il mio lavoro         | <input type="radio"/> | <input type="radio"/> | <input type="radio"/>                    | <input type="radio"/>   | <input type="radio"/>     |
| 14. Quando sono turbato, perdo il controllo                                     | <input type="radio"/> | <input type="radio"/> | <input type="radio"/>                    | <input type="radio"/>   | <input type="radio"/>     |
| 15. Quando sono turbato, credo che rimarrò in quello stato per molto tempo      | <input type="radio"/> | <input type="radio"/> | <input type="radio"/>                    | <input type="radio"/>   | <input type="radio"/>     |
| 16. Quando sono turbato, credo che finirò per sentirmi molto depresso           | <input type="radio"/> | <input type="radio"/> | <input type="radio"/>                    | <input type="radio"/>   | <input type="radio"/>     |

|                                                                                                    |                       |                       |                       |                       |                       |
|----------------------------------------------------------------------------------------------------|-----------------------|-----------------------|-----------------------|-----------------------|-----------------------|
| 17. Quando sono turbato, credo che i miei sentimenti siano validi e importanti                     | <input type="radio"/> |
| 18. Quando sono turbato, faccio fatica a focalizzarmi su altre cose                                | <input type="radio"/> |
| 19. Quando sono turbato, mi sento senza controllo                                                  | <input type="radio"/> |
| 20. Quando sono turbato, posso comunque finire le cose che devo fare                               | <input type="radio"/> |
| 21. Quando sono turbato, mi vergogno di come mi sento                                              | <input type="radio"/> |
| 22. Quando sono turbato, so che posso trovare un modo per sentirmi meglio                          | <input type="radio"/> |
| 23. Quando sono turbato, mi sento come se fossi debole                                             | <input type="radio"/> |
| 24. Quando sono turbato, sento di potere avere ancora il controllo dei miei comportamenti          | <input type="radio"/> |
| 25. Quando sono turbato, mi sento in colpa per sentirmi così                                       | <input type="radio"/> |
| 26. Quando sono turbato, ho delle difficoltà a concentrarmi                                        | <input type="radio"/> |
| 27. Quando sono turbato, ho delle difficoltà nel controllare i miei comportamenti                  | <input type="radio"/> |
| 28. Quando sono turbato, credo che non ci sia niente che io possa fare per sentirmi meglio         | <input type="radio"/> |
| 29. Quando sono turbato, mi irrita con me stesso perché mi sento in quel modo                      | <input type="radio"/> |
| 30. Quando sono turbato, inizio a sentirmi molto male con me stesso                                | <input type="radio"/> |
| 31. Quando sono turbato, credo che crollarmi in questa emozione sia l'unica cosa che io possa fare | <input type="radio"/> |
| 32. Quando sono turbato, perdo il controllo sui miei comportamenti                                 | <input type="radio"/> |

33. Quando sono turbato, faccio fatica a pensare a qualcosa di diverso

☐ ☐ ☐ ☐ ☐

34. Quando sono turbato, mi prendo del tempo per riflettere su quello che sto provando veramente

☐ ☐ ☐ ☐ ☐

35. Quando sono turbato, mi ci vuole molto tempo per sentirmi meglio

☐ ☐ ☐ ☐ ☐

36. Quando sono turbato, sento che le mie emozioni sono travolgenti

☐ ☐ ☐ ☐ ☐

### Snaith Hamilton Pleasure Scale

Segnare la casella corrispondente a QUANTO e' IN ACCORDO con ciascuna affermazione riportata, facendo riferimento a quanto ha provato NELLE ULTIME 2 SETTIMANE:

|                                                                                                                | Prevalentemente d'accordo | Prevalentemente in disaccordo |
|----------------------------------------------------------------------------------------------------------------|---------------------------|-------------------------------|
| 1) Di solito mi fanno piacere i miei programmi radiofonici o televisivi preferiti                              | <input type="radio"/>     | <input type="radio"/>         |
| 2) Di solito mi fa piacere stare con i familiari o con gli amici stretti                                       | <input type="radio"/>     | <input type="radio"/>         |
| 3) Di solito sono in grado di gustarmi i miei cibi preferiti                                                   | <input type="radio"/>     | <input type="radio"/>         |
| 4) Di solito provo piacere nei miei hobby o passatempi                                                         | <input type="radio"/>     | <input type="radio"/>         |
| 5) Di solito mi fa piacere un bagno caldo o una doccia rinfrescante                                            | <input type="radio"/>     | <input type="radio"/>         |
| 6) Di solito mi fa piacere il profumo dei fiori o l'odore di una fresca brezza marina o quello del pane fresco | <input type="radio"/>     | <input type="radio"/>         |
| 7) Di solito mi fa piacere vedere le facce sorridenti                                                          | <input type="radio"/>     | <input type="radio"/>         |
| 8) Di solito mi fa piacere apparire elegante quando ho preso cura del mio aspetto                              | <input type="radio"/>     | <input type="radio"/>         |
| 9) Di solito provo piacere nel leggere un libro, una rivista o un giornale                                     | <input type="radio"/>     | <input type="radio"/>         |
| 10) Di solito provo piacere a bere un caffè, un the o la mia bevanda preferita                                 | <input type="radio"/>     | <input type="radio"/>         |
| 11) Di solito mi danno piacere anche le piccole cose come ad esempio una luminosa giornata di sole             | <input type="radio"/>     | <input type="radio"/>         |
| 12) Di solito mi fa piacere vedere un bel paesaggio o una bella veduta                                         | <input type="radio"/>     | <input type="radio"/>         |
| 13) Di solito mi fa piacere aiutare gli altri                                                                  | <input type="radio"/>     | <input type="radio"/>         |

14) Di solito provo piacere  
quando ricevo lodi dagli altri

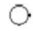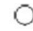

PSQI

Le seguenti domande si riferiscono alle abitudini di  
sonno durante l'ultimo mese. Si dovrà indicare la  
risposta che si riferisce alla maggior parte dei  
giorni delle notti dell'ultimo mese.

1) Durante l'ultimo mese a che ora e' andato a letto?

PSQI

2) Durante l'ultimo mese: quanto tempo (espresso in  
minuti) ha impiegato ad addormentarsi ogni notte?

PSQI

3) Durante l'ultimo mese: a che ora si e' svegliato la  
mattina?

PSQI

4) Durante l'ultimo mese: quante ore ha dormito  
realmente la notte (possono essere differenti dal  
numero di ore passate a letto)?

## PSQI

## 5) Durante l'ultimo mese, quanto spesso ha avuto problemi a dormire? Perché?

|                                                                                                                                | Mai durante l'ultimo mese | Meno di una volta a settimana | Una o due volte a settimana | Tre o più volte a settimana |
|--------------------------------------------------------------------------------------------------------------------------------|---------------------------|-------------------------------|-----------------------------|-----------------------------|
| a) Non riusciva ad addormentarsi entro 30 minuti da quando era andato a letto?                                                 | <input type="radio"/>     | <input type="radio"/>         | <input type="radio"/>       | <input type="radio"/>       |
| b) Si svegliava nel mezzo della notte o presto la mattina                                                                      | <input type="radio"/>     | <input type="radio"/>         | <input type="radio"/>       | <input type="radio"/>       |
| c) Doveva alzarsi per andare in bagno                                                                                          | <input type="radio"/>     | <input type="radio"/>         | <input type="radio"/>       | <input type="radio"/>       |
| d) Non riusciva a respirare bene                                                                                               | <input type="radio"/>     | <input type="radio"/>         | <input type="radio"/>       | <input type="radio"/>       |
| e) Tossiva o respirava rumorosamente                                                                                           | <input type="radio"/>     | <input type="radio"/>         | <input type="radio"/>       | <input type="radio"/>       |
| f) Sentiva caldo                                                                                                               | <input type="radio"/>     | <input type="radio"/>         | <input type="radio"/>       | <input type="radio"/>       |
| g) Sentiva freddo                                                                                                              | <input type="radio"/>     | <input type="radio"/>         | <input type="radio"/>       | <input type="radio"/>       |
| h) Faceva brutti sogni                                                                                                         | <input type="radio"/>     | <input type="radio"/>         | <input type="radio"/>       | <input type="radio"/>       |
| i) Aveva dolore                                                                                                                | <input type="radio"/>     | <input type="radio"/>         | <input type="radio"/>       | <input type="radio"/>       |
| j) Per un'altra o più ragioni. Può descriverle, indicando anche quanto spesso, ha avuto problemi a dormire per questa ragione? | <input type="radio"/>     | <input type="radio"/>         | <input type="radio"/>       | <input type="radio"/>       |

## PSQI

|                                                                                                                                                     | Mai durante l'ultimo mese | Meno di una volta a settimana | Una o due volte a settimana | Tre o piu' volte a settimana |
|-----------------------------------------------------------------------------------------------------------------------------------------------------|---------------------------|-------------------------------|-----------------------------|------------------------------|
| 6) Durante l'ultimo mese quanto spesso ha assunto farmaci (prescritti o di sua iniziativa) per dormire?                                             | <input type="radio"/>     | <input type="radio"/>         | <input type="radio"/>       | <input type="radio"/>        |
| 7) Durante l'ultimo mese quanto spesso ha avuto problemi a stare sveglio, mentre, per esempio, mangiava o era impiegato in qualche altra attivita'? | <input type="radio"/>     | <input type="radio"/>         | <input type="radio"/>       | <input type="radio"/>        |
| 8) Durante l'ultimo mese quanto problematico e' stato per lei mantenere l'entusiasmo per le cose che faceva?                                        | <input type="radio"/>     | <input type="radio"/>         | <input type="radio"/>       | <input type="radio"/>        |

## PSQI

9) Durante l'ultimo mese come valuterebbe la sua qualita' del sonno?

- ☐ Molto buona    ☐ Abbastanza buona  
☐ Abbastanza cattiva    ☐ Molto cattiva

**BHS**

**Istruzioni:** Qui sotto vi sono 20 affermazioni. Risponda se per Lei siano vere o false segnando una croce

(+ o x) nelle caselle corrispondenti. In caso di dubbio, dia la risposta che ritiene piu' vicina a quello che Lei

crede corrisponda meglio a quello che pensa. Abbia cura di segnare uno solo tra Vero e Falso per tutte

le affermazioni.

|                                                                                    | Falso                 | Vero                  |
|------------------------------------------------------------------------------------|-----------------------|-----------------------|
| 1) Vedo il futuro con speranza ed entusiasmo                                       | <input type="radio"/> | <input type="radio"/> |
| 2) Potrei arrendermi perche' non posso migliorare le cose per me                   | <input type="radio"/> | <input type="radio"/> |
| 3) Quando le cose vanno male, mi consola sapere che non puo' durare cosi in eterno | <input type="radio"/> | <input type="radio"/> |
| 4) Non posso immaginare quello che sara' della mia vita tra 10 anni                | <input type="radio"/> | <input type="radio"/> |
| 5) Ho abbastanza tempo per realizzare le cose che desidero fare di piu'            | <input type="radio"/> | <input type="radio"/> |
| 6) Nel futuro mi aspetto di riuscire in quello che mi interessa di piu'            | <input type="radio"/> | <input type="radio"/> |
| 7) Il mio futuro mi sembra buio                                                    | <input type="radio"/> | <input type="radio"/> |
| 8) Mi aspetto di ottenere dalla vita piu' cose buone rispetto alla persona media   | <input type="radio"/> | <input type="radio"/> |
| 9) Non mi prendo pause e non c'e' motivo per cui lo debba fare in futuro           | <input type="radio"/> | <input type="radio"/> |
| 10) Le mie esperienze passate mi hanno preparato bene per il futuro                | <input type="radio"/> | <input type="radio"/> |
| 11) Se guardo avanti vedo solo situazioni spiacevoli piuttosto che piacevoli       | <input type="radio"/> | <input type="radio"/> |
| 12) Non mi aspetto di ottenere cio' che voglio veramente                           | <input type="radio"/> | <input type="radio"/> |



13) Quando guardo al futuro, mi aspetto di essere piu' felice di adesso

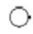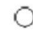

14) Le cose proprio non vanno come io desidero che vadano

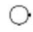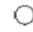

15) Ho una grossa fede nel futuro  
16) Non ottengo mai cio' che desidero, quindi e' sciocco desiderare alcunché

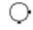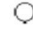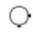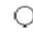

17) e' molto inverosimile che nel futuro io ottenga una vera soddisfazione

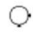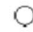

18) Il futuro mi sembra vago e incerto

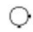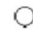

19) Posso sperare che arrivino bei tempi, piuttosto che brutti

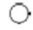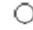

20) E' inutile provare ad ottenere cio' che voglio perche' probabilmente non ci riuscirò

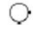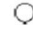



| HAM-A                                                                   |                       |                       |                       |                       |                       |
|-------------------------------------------------------------------------|-----------------------|-----------------------|-----------------------|-----------------------|-----------------------|
|                                                                         | 0= assente            | 1= lieve              | 2= moderato           | 3= grave              | 4= molto grave        |
| 1) Ansia                                                                | <input type="radio"/> |
| 2) Tensione                                                             | <input type="radio"/> |
| 3) Paure                                                                | <input type="radio"/> |
| 4) Insonnia                                                             | <input type="radio"/> |
| 5) Sfera intellettuale                                                  | <input type="radio"/> |
| 6) Umore depresso                                                       | <input type="radio"/> |
| 7) Sintomi somatici (apparato<br><input type="radio"/> muscolare)       | <input type="radio"/> | <input type="radio"/> | <input type="radio"/> | <input type="radio"/> |                       |
| 8) Sintomi somatici (organi di<br><input type="radio"/> senso)          | <input type="radio"/> | <input type="radio"/> | <input type="radio"/> | <input type="radio"/> |                       |
| 9) Sintomi cardiovascolari                                              | <input type="radio"/> |
| 10) Sintomi respiratori                                                 | <input type="radio"/> |
| 11) Sintomi gastrointestinali                                           | <input type="radio"/> |
| 12) Sintomi genito-urinari                                              | <input type="radio"/> |
| 13) Sintomi a carico del SN                                             | <input type="radio"/> |
| 14) Comportamento del soggetto<br><input type="radio"/> durante l'esame | <input type="radio"/> | <input type="radio"/> | <input type="radio"/> | <input type="radio"/> |                       |

| HAM-D                        |                                                                                                                                                                                                                                                                                                                                                                                                                                                                                             |
|------------------------------|---------------------------------------------------------------------------------------------------------------------------------------------------------------------------------------------------------------------------------------------------------------------------------------------------------------------------------------------------------------------------------------------------------------------------------------------------------------------------------------------|
| HAM_D<br>UMORE DEPRESSO      | <input type="radio"/> Assente<br><input type="radio"/> Manifesta questi sentimenti solo se interrogato<br><input type="radio"/> Esprime spontaneamente questi sentimenti<br><input type="radio"/> Comunica questi sentimenti con messaggi non verbali, cioè attraverso l'espressione del volto, la posizione del corpo, la voce e la tendenza al pianto<br><input type="radio"/> Il paziente manifesta quasi esclusivamente questi sentimenti mediante messaggi sia verbali che non verbali |
| HAM_D<br>SENTIMENTI DI COLPA | <input type="radio"/> Assenti<br><input type="radio"/> Autoaccusa, pensa di aver deluso la gente<br><input type="radio"/> Idee di colpa o ripensamenti su errori passati o su azioni peccaminose<br><input type="radio"/> L'attuale malattia è una punizione. Deliri di colpa<br><input type="radio"/> Ode voci di accusa o di denigrazione e/o ha esperienze allucinatorie visive a contenuto minaccioso                                                                                   |
| HAM_D<br>SUICIDIO            | <input type="radio"/> Assente<br><input type="radio"/> Pensa che la vita non valga la pena di essere vissuta<br><input type="radio"/> Vorrebbe essere morto o pensa alla possibilità di suicidarsi<br><input type="radio"/> Idee o gesti di suicidio<br><input type="radio"/> Tentativi di suicidio (ogni serio tentativo deve essere valutato)                                                                                                                                             |

|                             |                                                                                                                                                                                                                                                                                                                                                                                                                                                                                                                                                                                         |
|-----------------------------|-----------------------------------------------------------------------------------------------------------------------------------------------------------------------------------------------------------------------------------------------------------------------------------------------------------------------------------------------------------------------------------------------------------------------------------------------------------------------------------------------------------------------------------------------------------------------------------------|
| HAM_D<br>INSONNIA INIZIALE  | <input type="radio"/> Nessuna difficoltà ad addormentarsi<br><input type="radio"/> Lamenta di avere talvolta difficoltà ad addormentarsi (per es. gli occorre più di mezz'ora)<br><input type="radio"/> Ha sempre difficoltà ad addormentarsi                                                                                                                                                                                                                                                                                                                                           |
| HAM_D<br>INSONNIA CENTRALE  | <input type="radio"/> Nessuna difficoltà<br><input type="radio"/> Lamenta di essere diventato irrequieto durante la notte<br><input type="radio"/> Si sveglia durante la notte (segnare 2 ogni volta che si alza dal letto, a meno che non sia per urinare)                                                                                                                                                                                                                                                                                                                             |
| HAM_D<br>INSONNIA RITARDATA | <input type="radio"/> Nessuna difficoltà<br><input type="radio"/> Si risveglia precocemente (nelle prime ore del mattino) ma si riaddormenta<br><input type="radio"/> È incapace di riaddormentarsi se si alza dal letto                                                                                                                                                                                                                                                                                                                                                                |
| HAM_D<br>LAVORO E INTERESSI | <input type="radio"/> Nessuna difficoltà<br><input type="radio"/> Pensieri e sentimenti di incapacità, facile affaticabilità e debolezza nelle attività (lavoro e hobbies)<br><input type="radio"/> Perdita di interesse per le attività - lavoro o hobbies - sia riferite direttamente dal paziente, sia espresse mediante atteggiamenti, quali indifferenza, indecisione ed incertezza (sente che deve sforzarsi di lavorare)<br><input type="radio"/> Dedica un minor tempo alle attività o è meno efficiente<br><input type="radio"/> Ha cessato di lavorare a causa della malattia |
| HAM_D<br>RALLENTAMENTO      | <input type="radio"/> Pensiero e linguaggio normali<br><input type="radio"/> Lieve rallentamento durante il colloquio<br><input type="radio"/> Evidente rallentamento durante il colloquio<br><input type="radio"/> Colloquio difficile<br><input type="radio"/> Stato di arresto psicomotorio                                                                                                                                                                                                                                                                                          |
| HAM_D<br>AGITAZIONE         | <input type="radio"/> Assente<br><input type="radio"/> Irrequietezza<br><input type="radio"/> Gioca con le mani, con i capelli ecc.<br><input type="radio"/> Si muove in continuazione, non riesce a stare seduto<br><input type="radio"/> Si torce le mani, si morde le unghie, si tira i capelli, si morde le labbra                                                                                                                                                                                                                                                                  |
| HAM_D<br>ANSIA PSICHICA     | <input type="radio"/> Assente<br><input type="radio"/> Tensione soggettiva ed irritabilità<br><input type="radio"/> Preoccupazioni per questioni di poco conto<br><input type="radio"/> Atteggiamento apprensivo evidente dalla mimica o dal linguaggio<br><input type="radio"/> Manifesta spontaneamente paure                                                                                                                                                                                                                                                                         |
| HAM_D<br>ANSIA SOMATICA     | <input type="radio"/> Assente<br><input type="radio"/> Lieve<br><input type="radio"/> Moderata<br><input type="radio"/> Notevole<br><input type="radio"/> Invalidante<br><input type="radio"/>                                                                                                                                                                                                                                                                                                                                                                                          |

|                                                                                                              |                                                                                                                                                                                                                                                                                                                                                                            |
|--------------------------------------------------------------------------------------------------------------|----------------------------------------------------------------------------------------------------------------------------------------------------------------------------------------------------------------------------------------------------------------------------------------------------------------------------------------------------------------------------|
| HAM_D<br>SINTOMI SOMATICI GASTROINTESTINALI                                                                  | <input type="radio"/> Assenti<br><input type="radio"/> Perdita dell'appetito, ma si alimenta senza essere stimolato o aiutato dal personale. Senso di peso all'addome.<br><input type="radio"/> Difficolta' ad alimentarsi senza lo stimolo o l'aiuto del personale. Richiede o ha bisogno di lassativi o di farmaci per i disturbi gastrointestinali                      |
| HAM_D<br>SINTOMI SOMATICI GENERALI                                                                           | <input type="radio"/> Assenti<br><input type="radio"/> Pesantezza agli arti, alla schiena o alla testa. Mal di testa, mal di schiena, dolori muscolari. Perdita di energia e facile affaticabilita'<br><input type="radio"/> Se i sintomi sono molto evidenti segnare 2                                                                                                    |
| HAM_D<br>SINTOMI GENITALI                                                                                    | <input type="radio"/> Assente<br><input type="radio"/> Lieve<br><input type="radio"/> Gravi                                                                                                                                                                                                                                                                                |
| HAM_D<br>IPOCONDRIA                                                                                          | <input type="radio"/> Assente<br><input type="radio"/> Polarizzazione sul proprio corpo<br><input type="radio"/> Preoccupazione per la propria salute<br><input type="radio"/> Frequenti lamentele, richieste di aiuto ecc...<br><input type="radio"/> Deliri ipocondriaci (ferma convinzione di avere una malattia somatica, senza che ve ne siano i motivi)              |
| HAM_D<br>PERDITA DI PESO (SECONDO IL PAZIENTE O I FAMILIARI o VALUTAZIONE OBIETTIVA ESEGUITA PERIODICAMENTE) | <input type="radio"/> Nessuna perdita di peso / meno di mezzo kg in una settimana<br><input type="radio"/> Probabile perdita di peso associata alla presente malattia / piu' di mezzo kg in una settimana<br><input type="radio"/> Evidente perdita di peso / piu' di 1 kg in una settimana<br><input type="radio"/> Non valutata                                          |
| HAM_D<br>INSIGHT                                                                                             | <input type="radio"/> Non ammalato / Riconosce di essere depresso e ammalato<br><input type="radio"/> Riconosce di essere ammalato ma attribuisce la responsabilita' alla cattiva alimentazione, al clima, al superlavoro, a malattie infettive, al bisogno di riposo<br><input type="radio"/> Nega decisamente di essere ammalato                                         |
| <b>MRS</b>                                                                                                   |                                                                                                                                                                                                                                                                                                                                                                            |
| MRS - MANIA RATING SCALE                                                                                     | <input type="radio"/> Assente<br><input type="radio"/> Lievemente o probabilmente aumentato su richiesta<br><input type="radio"/> Innalzamento soggettivo certo, il paziente e' ottimista, sicuro di se', allegro, adeguato al contesto<br><input type="radio"/> Elevato, inadeguato al contesto, spiritoso<br><input type="radio"/> Euforico, ride inadeguatamente, canta |
| 1. INNALZAMENTO DELL'UMORE                                                                                   |                                                                                                                                                                                                                                                                                                                                                                            |

|                                         |                                                                                                                                                                                                                                                                                                                                                                                                                         |
|-----------------------------------------|-------------------------------------------------------------------------------------------------------------------------------------------------------------------------------------------------------------------------------------------------------------------------------------------------------------------------------------------------------------------------------------------------------------------------|
| MRS - MANIA RATING SCALE                | <input type="radio"/> Assente<br><input type="radio"/> Soggettivamente aumentata<br><input type="radio"/> Vivace, gestualita' aumentata<br><input type="radio"/> Energia eccessiva, a volte iperattivo, irrequieto (puo' essere calmato)<br><input type="radio"/> Eccitamento motorio, iperattivita' continua (non puo' essere calmato)                                                                                 |
| 2. AUMENTO ATTIVITA'-ENERGIA MOTORIA    |                                                                                                                                                                                                                                                                                                                                                                                                                         |
| MRS - MANIA RATING SCALE                | <input type="radio"/> Normale, non aumentato<br><input type="radio"/> Lievemente o probabilmente aumentato<br><input type="radio"/> Aumento soggettivo certo dietro richiesta<br><input type="radio"/> Soddisfazione sessuale istintiva, elabora storie sessuali, si presenta da ipersessuale<br><input type="radio"/> Comportamenti sessuali manifesti (verso pazienti, personale o intervistatori)                    |
| 3. INTERESSE SESSUALE                   |                                                                                                                                                                                                                                                                                                                                                                                                                         |
| MRS - MANIA RATING SCALE                | <input type="radio"/> Non riferisce riduzione del sonno<br><input type="radio"/> Sonno inferiore al normale fino ad un'ora<br><input type="radio"/> Sonno inferiore al normale oltre un'ora<br><input type="radio"/> Riferisce diminuito il bisogno di dormire<br><input type="radio"/> Nega il bisogno del sonno                                                                                                       |
| 4. SONNO                                |                                                                                                                                                                                                                                                                                                                                                                                                                         |
| MRS - MANIA RATING SCALE                | <input type="radio"/> Assente<br><input type="radio"/> Soggettivamente aumentata<br><input type="radio"/> Irritabile talvolta durante l'intervista, recenti episodi di rabbia o di disturbo del reparto<br><input type="radio"/> Frequentemente irritabile durante l'intervista; conciso, risoluto in tutto<br><input type="radio"/> Ostile, non cooperativo; intervista impossibile                                    |
| 5. IRRITABILITA'                        |                                                                                                                                                                                                                                                                                                                                                                                                                         |
| MRS - MANIA RATING SCALE                | <input type="radio"/> Nessun aumento<br><input type="radio"/> E' loquace<br><input type="radio"/> Aumentati, talvolta, ritmo e produttivita', talvolta prolisso<br><input type="radio"/> Aggressivita' costantemente aumentati ritmo e produttivita', difficile l'interruzione<br><input type="radio"/> Eloquio pressante, ininterrotto, continuo                                                                       |
| 6. ELOQUIO (ritmo e produttivita')      |                                                                                                                                                                                                                                                                                                                                                                                                                         |
| MRS - MANIA RATING SCALE                | <input type="radio"/> Assente<br><input type="radio"/> Circostanziale, lieve distraibilita', pensieri accelerati<br><input type="radio"/> Distraibile, perde la finalita' del ragionamento, cambia frequentemente gli argomenti, corsa dei pensieri<br><input type="radio"/> Fuga delle idee, tangenzialita', difficolta' a seguire, assonanza, ecolalia<br><input type="radio"/> Incoerenza, comunicazione impossibile |
| 7. DISTURBO DEL LINGUAGGIO-PENSIERO     |                                                                                                                                                                                                                                                                                                                                                                                                                         |
| MRS - MANIA RATING SCALE                | <input type="radio"/> Normale<br><input type="radio"/> Progetti incerti, nuovi interessi<br><input type="radio"/> Progetti speciali, iperreligioso<br><input type="radio"/> Idee grandiose o paranoidee, idee di riferimento<br><input type="radio"/> Deliri, allucinazioni                                                                                                                                             |
| 8. CONTENUTO                            |                                                                                                                                                                                                                                                                                                                                                                                                                         |
| MRS - MANIA RATING SCALE                | <input type="radio"/> Assente, cooperativo<br><input type="radio"/> Sarcastico, talvolta chiassoso, sospettoso<br><input type="radio"/> Esigente, fa minacce in reparto<br><input type="radio"/> Minaccia l'intervistatore, grida, intervista difficile<br><input type="radio"/> Aggredisce, e' distruttivo, intervista impossibile                                                                                     |
| 9. COMPORTAMENTO AGGRESSIVO-DISTRUTTIVO |                                                                                                                                                                                                                                                                                                                                                                                                                         |



## MRS - MANIA RATING SCALE

## 10. ASPETTO

- ☐ Abbigliamento adeguato e curato  
☐ Minimamente trascurato  
☐ Scarsamente curato, moderatamente disordinato, abbigliamento vistoso  
☐ Disordinato, parzialmente vestito, trucco vistoso  
☐ Completamente trascurato, imbellettato, abbigliamento bizzarro

## MRS - MANIA RATING SCALE

## 11. CONSAPEVOLEZZA

- ☐ Non ammalato / Presente, ammette la malattia, in accordo con la necessita' di una terapia  
☐ Probabilmente ammalato  
☐ Ammette un cambiamento del comportamento, ma neg la malattia  
☐ Ammette un possibile cambiamento del comportamento, ma nega la malattia  
☐ Nega qualsiasi cambiamento del comportamento

## KMDRS

## Koukopoulos Mixed Depression Rating Scale

## 1) ESPRESSIONE DI SOFFERENZA

- ☐ espressioni laconiche di sofferenza depressiva  
☐ descrizioni di sofferenza animate e prolungate  
☐ drammatiche espressioni di sofferenza e disperazione  
☐ scoppi di lamentele e attacchi di pianto

## KOUKOPOULOS MIXED DEPRESSION RATING SCALE

## 2) MIMICA FACIALE VIVACE

- ☐ espressioni faciali ridotte  
☐ espressioni faciali che manifestano chiaramente le emozioni  
☐ vivaci espressioni delle emozioni  
☐ drammatiche espressioni delle emozioni

## KOUKOPOULOS MIXED DEPRESSION RATING SCALE

## 3) PRODUTTIVITA' DELL'ELOQUIO

- ☐ eloquio rallentato  
☐ eloquio nella norma  
☐ eloquio fluido, conversazione non compromessa  
☐ chiaramente logorroico, la conversazione e' compromessa

## KOUKOPOULOS MIXED DEPRESSION RATING SCALE

## 4) LABILITA' EMOTIVA

- ☐ assente  
☐ cambiamenti d'umore limitati allo spettro depressivo-disforico, es. passa dalla tristezza alla rabbia  
☐ cambiamenti sempre all'interno dello spettro depressivo-disforico ma le emozioni sono piu' intense, es. disperazione, furia  
☐ passa dall'umore depresso all'esaltazione

## KOUKOPOULOS MIXED DEPRESSION RATING SCALE

## 5) ATTIVITA' MOTORIA/IRREQUIETEZZA

Accertarsi che l'iperattivita' motoria/irrequietezza sia visibile (o effettivamente accaduta) e non sia solamente una sensazione soggettiva (e' stato cosi' irrequieto e smanioso da non riuscire a rimanere seduto? Deve continuare a camminare su e giu'?)

- ☐ (0) rallentamento psicomotorio  
☐ (2) psicomotricita' nella norma  
☐ (4) evidente irrequietezza ma in grado di rimanere seduto  
☐ (6) incapace di rimanere seduto o cammina molto spesso su e giu'

|                                                                                                                                                                                                                                                                                                                                                                                                                                                             |                                                                                                                                                                                                                                                                                                                                                                                                                                                                       |
|-------------------------------------------------------------------------------------------------------------------------------------------------------------------------------------------------------------------------------------------------------------------------------------------------------------------------------------------------------------------------------------------------------------------------------------------------------------|-----------------------------------------------------------------------------------------------------------------------------------------------------------------------------------------------------------------------------------------------------------------------------------------------------------------------------------------------------------------------------------------------------------------------------------------------------------------------|
| <p>KOUKOPOULOS MIXED DEPRESSION RATING SCALE</p> <p>6) SENSAZIONI SOGGETTIVE DI IRRITABILITA' E RABBIA NON PROVOCATA</p>                                                                                                                                                                                                                                                                                                                                    | <p><input type="radio"/> assente</p> <p><input type="radio"/> lamenta irritabilita' per ragioni minori</p> <p><input type="radio"/> si sente abbastanza arrabbiato/a senza alcuna ragione</p> <p><input type="radio"/> sente la voglia di rompere delle cose (o sente la voglia di agire contro se stesso/a o altri)</p>                                                                                                                                              |
| <p>KOUKOPOULOS MIXED DEPRESSION RATING SCALE</p> <p>7) MANIFESTE ESPRESSIONI DI IRRITABILITA' E RABBIA (Come ha manifestato la sua rabbia, insofferenza, irritabilita'? Ha avuto discussioni? Ha perso la pazienza, ha lanciato o rotto oggetti? Le e' successo di colpire fisicamente qualcuno?)</p>                                                                                                                                                       | <p><input type="radio"/> (0) assente</p> <p><input type="radio"/> (2) manifesta facilmente insofferenza, impazienza, occasionalmente aggressivo/a verbalmente</p> <p><input type="radio"/> (4) occasionalmente violento/a contro gli oggetti</p> <p><input type="radio"/> (6) occasionalmente violento/a contro se stesso o altri</p>                                                                                                                                 |
| <p>KOUKOPOULOS MIXED DEPRESSION RATING SCALE</p> <p>8) ACCELERAZIONE E/O AFFOLLAMENTO DEI PENSIERI</p> <p>Notare i riferimenti spontanei prima di porre la domanda diretta.<br/>(Ha avuto piu' pensieri del solito o piu' di quanti ne riesca a gestire? Ha interferito con il suo prendere sonno? I suoi pensieri si sono rincorsi velocemente?)</p>                                                                                                       | <p><input type="radio"/> assente</p> <p><input type="radio"/> ruminazioni depressive o dolorose</p> <p><input type="radio"/> pensieri o ricordi affollati, alcuni dei quali potrebbero non essere dolorosi.</p> <p><input type="radio"/> pensieri accelerati o motivi musicali persistenti nella testa.</p>                                                                                                                                                           |
| <p>KOUKOPOULOS MIXED DEPRESSION RATING SCALE</p> <p>9) TENSIONE INTERNA</p> <p>Notare i riferimenti spontanei prima di porre la domanda diretta. Questa e' una sensazione particolare e stressante di tensione nervosa. Questa sensazione puo' essere accompagnata dalla sensazione di essere bloccati nelle attivita' mentali. (Si sente con i nervi a fior di pelle, teso/a o stressato/a? Questa tensione le impedisce di fare le cose, di pensare?)</p> | <p><input type="radio"/> assente</p> <p><input type="radio"/> questa sensazione e' riportata solo se elicitata</p> <p><input type="radio"/> questa sensazione e' riportata spontaneamente come una parte stressante della condizione</p> <p><input type="radio"/> il/la paziente riporta di essere tormentato/a da una sensazione di tensione e agitazione interna. La pressione arteriosa diastolica puo' essere &gt; 90 mmHg.</p>                                   |
| <p>KOUKOPOULOS MIXED DEPRESSION RATING SCALE</p> <p>10) TENSIONE MUSCOLARE</p> <p>Ha avuto difficolta' a rilassare i muscoli da quando e' depresso/a? Sente i suoi muscoli tesi? Dove ha sentito la tensione? Era in grado di rilassarsi?)</p>                                                                                                                                                                                                              | <p><input type="radio"/> assente</p> <p><input type="radio"/> tensione muscolare riportata solo in seguito a domanda</p> <p><input type="radio"/> tensione muscolare lieve e ricorrente con qualche possibilita' di rilassarsi</p> <p><input type="radio"/> definita esperienza di tensione muscolare senza capacita' di rilassarsi, o tensione visibile (possibili tremori). Il paziente puo' lamentare dolenzia muscolare, soprattutto al collo e alla schiena.</p> |
| <p>KOUKOPOULOS MIXED DEPRESSION RATING SCALE</p> <p>11) INSONNIA INIZIALE E CENTRALE</p> <p>(Ha avuto difficolta' ad addormentarsi? Quanto tempo impiega ad addormentarsi una volta andato a letto? Si sveglia nel mezzo della notte? Se si sveglia, riesce a riaddormentarsi?)</p>                                                                                                                                                                         | <p><input type="radio"/> assente</p> <p><input type="radio"/> lamenta difficolta' di addormentamento della durata di non piu' di mezz'ora</p> <p><input type="radio"/> lamenta difficolta' di addormentamento della durata di piu' di un'ora e/o due o piu' risvegli durante la notte</p> <p><input type="radio"/> insonnia pressoché totale per la difficolta' di addormentamento e per i numerosi risvegli durante la notte</p>                                     |



## KOUKOPOULOS MIXED DEPRESSION RATING SCALE

## 12) IMPULSIVITA' SUICIDA

(Ha avuto pensieri di uccidersi o di farsi del mal? Questi pensieri erano impulsivi, arrivavano all'improvviso? Spesso in momenti di rabbia? Ha mai effettivamente fatto qualcosa?)

- ☐ (0) assenti  
☐ (2) pensieri suicidi possibilmente impulsivi  
☐ (4) pensieri suicidi impulsivi certamente presenti  
☐ (6) tentativo/i di suicidio impulsivi (come tentare di gettarsi da una macchina)

## KOUKOPOULOS MIXED DEPRESSION RATING SCALE

## 13) SESSUALITA'

Quando una persona diviene depressa ha meno desiderio sessuale del solito. Ha notato occasionalmente un aumento del desiderio sessuale e/o dell'attività?

- ☐ attività e/o desiderio sessuale ridotti  
☐ attività sessuale nella norma  
☐ ipersessualità occasionale  
☐ frequente ipersessualità

## KOUKOPOULOS MIXED DEPRESSION RATING SCALE

## 14) SINTOMI PSICOTICI

Ha mai pensato che gli altri stessero facendo qualcosa contro di lei? Ha mai pensato di essere al centro degli interessi degli altri? Ha mai sentito rumori o voci?

- ☐ assenti  
☐ sospettosità  
☐ idee di riferimento  
☐ deliri e/o allucinazioni

## CAPS - Criterio B. Sintomi intrusivi (need 1 for diagnosis)

|                                                                                                                                                                                                                                                                                | Assento               | Lieve                 | Moderato              | Grave                 | Molto Grave |
|--------------------------------------------------------------------------------------------------------------------------------------------------------------------------------------------------------------------------------------------------------------------------------|-----------------------|-----------------------|-----------------------|-----------------------|-------------|
| Ricordi spiacevoli ricorrenti e<br>intrusivi dell'evento                                                                                                                                                                                                                       | <input type="radio"/> | <input type="radio"/> | <input type="radio"/> | <input type="radio"/> |             |
| Sogni spiacevoli ricorrenti<br>dell'evento                                                                                                                                                                                                                                     | <input type="radio"/> | <input type="radio"/> | <input type="radio"/> | <input type="radio"/> |             |
| Reazioni dissociative (ad<br>l'individuo si sente o agisce<br>come se l'evento traumatico si<br>stesse ripresentando. (Tali<br>reazioni possono verificarsi su<br>un continuum, con l'espressione<br>più estrema di una completa<br>perdita di consapevolezza del<br>presente) | <input type="radio"/> | <input type="radio"/> | <input type="radio"/> | <input type="radio"/> |             |
| Disagio psicologico intenso<br>scatenanti interni o esterni che<br>simbolizzano o assomigliano a<br>qualche aspetto dell'evento<br>traumatico                                                                                                                                  | <input type="radio"/> | <input type="radio"/> | <input type="radio"/> | <input type="radio"/> |             |

all'esposizione a fattori

Reattività fisiologica o  
☐ interni o esterni che  
 simbolizzano o assomigliano a  
 qualche aspetto dell'evento  
 traumatico

☐ esposizione a fattori scatenanti

#### CAPS - Criterio C. Sintomi d'evitamento (need 1 for diagnosis)

|                                                                                                       | Assento               | Lieve                 | Moderato              | Grave                 | Molto grave                   |
|-------------------------------------------------------------------------------------------------------|-----------------------|-----------------------|-----------------------|-----------------------|-------------------------------|
| Sforzi per evitare ricordi,<br><input type="radio"/> pensieri e sensazioni associate<br>con il trauma | <input type="radio"/> | <input type="radio"/> | <input type="radio"/> | <input type="radio"/> |                               |
| Sforzi per evitare attività, luoghi<br><input type="radio"/> del trauma                               | <input type="radio"/> | <input type="radio"/> | <input type="radio"/> | <input type="radio"/> | o persone che evocano ricordi |

#### CAPS - Criterio D. Sintomi dell'umore e cognitivi (need 2 for diagnosis)

|                                                                                                                                                                  | Assento               | Lieve                 | Moderato              | Grave                 | Molto grave           |
|------------------------------------------------------------------------------------------------------------------------------------------------------------------|-----------------------|-----------------------|-----------------------|-----------------------|-----------------------|
| Incapacità di ricordare qualche<br>aspetto importante del trauma                                                                                                 | <input type="radio"/> |
| Credenze negative o aspettative<br>su se stessi, gli altri, o il mondo                                                                                           | <input type="radio"/> |
| Persistente, distorta cognizione<br>circa la causa o le conseguenze<br>dell'evento traumatico che<br>conducono l'individuo ad<br>incolpare se stesso o gli altri | <input type="radio"/> |
| Persistente stato emotivo<br>negativo (ad esempio, paura,<br>orrore, rabbia, senso di colpa, o<br>vergogna)                                                      | <input type="radio"/> |
| Notevole diminuzione<br>dell'interesse o della<br>partecipazione ad attività<br>significative                                                                    | <input type="radio"/> |
| Sentimenti di distacco o di<br>estraneità verso gli altri                                                                                                        | <input type="radio"/> |
| Persistente incapacità di<br>sperimentare emozioni positive                                                                                                      | <input type="radio"/> |

**CAPS - Criterio E. Sintomi arousal e reattività (need 2 for diagnosis)**

|                                                    | Assente               | Lieve                 | Moderato              | Grave                 | Molto grave           |
|----------------------------------------------------|-----------------------|-----------------------|-----------------------|-----------------------|-----------------------|
| Irritabilità o scoppi di collera                   | <input type="radio"/> |
| Comportamento avventato o autodistruttivo          | <input type="radio"/> |
| Ipervigilanza                                      | <input type="radio"/> |
| Esagerate risposte di allarme                      | <input type="radio"/> |
| Problemi di concentrazione                         | <input type="radio"/> |
| Difficoltà ad addormentarsi o a mantenere il sonno | <input type="radio"/> |

**CAPS - Criterio F. Durata (needed for diagnosis)**

CAPS (Criterio F): La sintomatologia dura da almeno un mese? ☐ No ☐ Si

**CAPS - Criterio G. Distress o impairment (needed for diagnosis)**

CAPS (Criterio G) Il disturbo causa un disagio clinicamente significativo o menomazione nel funzionamento sociale, lavorativo o di altre aree importanti? ☐ No ☐ Si

**CAPS (Criterio G)**

|                                                                                      | Assente               | Lieve                 | Moderato              | Grave                 | Molto grave           |
|--------------------------------------------------------------------------------------|-----------------------|-----------------------|-----------------------|-----------------------|-----------------------|
| Stress soggettivo                                                                    | <input type="radio"/> |
| Alterazione del funzionamento sociale                                                | <input type="radio"/> |
| Alterazione del funzionamento lavorativo o un'altra area importante di funzionamento | <input type="radio"/> |

CAPS  
26) Validità globale  
stimare la validità complessiva delle risposte.  
Considerare i fattori  
come la compliance al colloquio, lo stato mentale (ad  
es.  
problemi di concentrazione, comprensione degli  
oggetti,  
dissociazione), e la prova di sforzi per esagerare o  
ridurre al minimo i sintomi

- ☐ Eccellente, nessun motivo per sospettare risposte non valide  
☐ Buono, fattori che possono influire negativamente la validità  
☐ Equo, fattori presenti che sicuramente riducono la validità  
☐ Validità scadente e sostanzialmente ridotta  
☐ Risposte non valide, stato mentale gravemente compromesso

## CAPS

## 27) Gravita' globale

stimare la gravita' complessiva dei sintomi di PTSD. Considerare il grado di disagio soggettivo, il grado di compromissione, l'osservazione dei comportamenti durante colloquio e il giudizio per quanto riguarda lo stile di risposta

- ☐ Nessun sintomo clinicamente significativo, nessuna sofferenza e nessun danno funzionale
- ☐ Disturbo lieve, minimo o danno funzionale
- ☐ Disagio moderato, definito o funzionale compromissione ma funziona in modo soddisfacente con lo sforzo
- ☐ Grave, notevole disagio o funzionale compromissione, funzionamento limitato anche con sforzo
- ☐ Disturbo estremo, marcato o marcato deterioramento in due o più aree principali di funzionamento

**CAPS - Sottotipo con sintomi dissociativi (need 1 for subtype)**

## CAPS

29) Depersonalizzazione: Esperienze persistenti o ricorrenti di sentirsi distaccati, e come se si fosse un osservatore esterno, dei propri processi mentali o del proprio corpo

- ☐ Assente
- ☐ Lieve / sottosoglia
- ☐ Moderato / soglia
- ☐ Grave / notevolmente elevata
- ☐ Estremo / inabilitazione

## CAPS

30) Derealizzazione: esperienze persistenti o ricorrenti di irrealta' dell'ambiente circostante

- ☐ Assente
- ☐ Lieve / sottosoglia
- ☐ Moderato / soglia
- ☐ Grave / notevolmente elevata
- ☐ Estremo / inabilitazione
